# Supplementary material
Source: PubMed Central journal article supplement (PMC7529406)
Supplement: mmc1.pdf [file mmc1.pdf]

## QUESTIONNAIRE (English version):

1. Considering the global context in the hotel sector over the last five years, evaluate the frequency, impact and predictability of the following nine types of change, using a scale from 1 to 7, with 1 being “very low level” and 7 being “very high level”.

| TYPE OF CHANGES                                                                                                                    | Frequency     | Predictability | Impact        |
|------------------------------------------------------------------------------------------------------------------------------------|---------------|----------------|---------------|
| Competitors (e.g., new hotels, changes in the competitor's offer, new pricing policy)                                              | 1 2 3 4 5 6 7 | 1 2 3 4 5 6 7  | 1 2 3 4 5 6 7 |
| Customers (e.g., new types of tourists, changes in demand)                                                                         | 1 2 3 4 5 6 7 | 1 2 3 4 5 6 7  | 1 2 3 4 5 6 7 |
| Intermediaries: tour operators, travel agencies (e.g., tour operator bankruptcy, mergers and/or alliances between travel agencies) | 1 2 3 4 5 6 7 | 1 2 3 4 5 6 7  | 1 2 3 4 5 6 7 |
| Suppliers: transport companies, laundry, animation... (e.g., new airlines, changes in contract conditions)                         | 1 2 3 4 5 6 7 | 1 2 3 4 5 6 7  | 1 2 3 4 5 6 7 |
| Other partners and/or external agents (e.g., new tourism clusters, changes in professional associations)                           | 1 2 3 4 5 6 7 | 1 2 3 4 5 6 7  | 1 2 3 4 5 6 7 |
| Economic context (e.g., new economic alliances between countries, currency changes, changes in economic cycles)                    | 1 2 3 4 5 6 7 | 1 2 3 4 5 6 7  | 1 2 3 4 5 6 7 |
| Political-legal context (e.g., regulation of vacation homes, tourism rehabilitation policies, new taxes)                           | 1 2 3 4 5 6 7 | 1 2 3 4 5 6 7  | 1 2 3 4 5 6 7 |
| Technological context (e.g., social networks, hotel management software, online commerce)                                          | 1 2 3 4 5 6 7 | 1 2 3 4 5 6 7  | 1 2 3 4 5 6 7 |
| Environmental context (e.g., torrential rains, fires, volcanic eruptions)                                                          | 1 2 3 4 5 6 7 | 1 2 3 4 5 6 7  | 1 2 3 4 5 6 7 |

2. Regarding how your hotel acts to cope with changes in the environment, indicate your degree of agreement on each of the following statements using a scale from 1 to 7, with 1 being “strongly disagree” and 7 being “strongly agree”.

| IN THE FACE OF CHANGE, MY HOTEL...                                                                                                                                                          |   |   |   |   |   |   |   |
|---------------------------------------------------------------------------------------------------------------------------------------------------------------------------------------------|---|---|---|---|---|---|---|
| Identifies the most important changes in the hotel environment (new needs of tourists, disappearance of tour operators, alliances between hotels...).                                       | 1 | 2 | 3 | 4 | 5 | 6 | 7 |
| Maintains a continuous strategic vision (is managed from a continuous strategic vision).                                                                                                    | 1 | 2 | 3 | 4 | 5 | 6 | 7 |
| Designs and updates its business strategy to adapt to the changing environment.                                                                                                             | 1 | 2 | 3 | 4 | 5 | 6 | 7 |
| Reflects on past experiences (successes and failures) and gathers useful knowledge from lessons learned.                                                                                    | 1 | 2 | 3 | 4 | 5 | 6 | 7 |
| Develops relationships based on trust with partners and/or external agents (sharing information, holding regular meetings...)                                                               | 1 | 2 | 3 | 4 | 5 | 6 | 7 |
| Stimulates employee participation and involvement in the company's decisions and actions                                                                                                    | 1 | 2 | 3 | 4 | 5 | 6 | 7 |
| Stimulates knowledge development and continuous learning                                                                                                                                    | 1 | 2 | 3 | 4 | 5 | 6 | 7 |
| Provides high quality products and services to the customer                                                                                                                                 | 1 | 2 | 3 | 4 | 5 | 6 | 7 |
| Stimulates a strong commitment to quality management and stakeholder satisfaction (customers, suppliers, employees...)                                                                      | 1 | 2 | 3 | 4 | 5 | 6 | 7 |
| Continuously improves products, services and processes (control of activities, evaluation of system errors, improvement projects identification...)                                         | 1 | 2 | 3 | 4 | 5 | 6 | 7 |
| Stimulates creativity and idea development about products, services and processes (menu changes, new animation program...)                                                                  | 1 | 2 | 3 | 4 | 5 | 6 | 7 |
| Performs organisational changes facing both challenges and opportunities (new market niches, new product lines, new procedures, new departmental structures...).                            | 1 | 2 | 3 | 4 | 5 | 6 | 7 |
| Achieves a new organisational equilibrium by adapting to changes in the environment (offering new products or services, incorporating new technologies, negotiating with tour operators...) | 1 | 2 | 3 | 4 | 5 | 6 | 7 |
| Recovers and strengthens at a strategic and operational level (recovering the hotel occupancy rate, improving its competitive position...)                                                  | 1 | 2 | 3 | 4 | 5 | 6 | 7 |
| Adapts strategically and operationally to new environmental conditions                                                                                                                      | 1 | 2 | 3 | 4 | 5 | 6 | 7 |

3. Assess the performance of your hotel in the last five years, according to the following items, using a scale from 1 to 7, with 1 being "very low level" and 7 being "very high level".

| ITEMS                       |   |   |   |   |   |   |   |
|-----------------------------|---|---|---|---|---|---|---|
| Return on investment        | 1 | 2 | 3 | 4 | 5 | 6 | 7 |
| Average sales growth        | 1 | 2 | 3 | 4 | 5 | 6 | 7 |
| Average market share growth | 1 | 2 | 3 | 4 | 5 | 6 | 7 |
| Hotel image and reputation  | 1 | 2 | 3 | 4 | 5 | 6 | 7 |
| Customer loyalty            | 1 | 2 | 3 | 4 | 5 | 6 | 7 |

**HOTEL CLASSIFICATION DATA:**

|                                     |                                                                                                                                                                                                                                                        |
|-------------------------------------|--------------------------------------------------------------------------------------------------------------------------------------------------------------------------------------------------------------------------------------------------------|
| The hotel is identified as a:       | <input type="checkbox"/> Beach hotel<br><input type="checkbox"/> Business hotel<br><input type="checkbox"/> City hotel<br><input type="checkbox"/> Rural hotel<br><input type="checkbox"/> Other                                                       |
| The hotel belongs to a hotel chain: | <input type="checkbox"/> Yes<br><input type="checkbox"/> No                                                                                                                                                                                            |
| Hotel category:                     | <input type="checkbox"/> 4 stars<br><input type="checkbox"/> 5 stars<br><input type="checkbox"/> Great Luxury                                                                                                                                          |
| Age of the hotel (years):           | <input type="checkbox"/> 1-5<br><input type="checkbox"/> 6-10<br><input type="checkbox"/> 11-15<br><input type="checkbox"/> 16-20<br><input type="checkbox"/> 21-25<br><input type="checkbox"/> 26-30<br><input type="checkbox"/> > 30                 |
| Number of hotel employees:          | <input type="checkbox"/> 1-100<br><input type="checkbox"/> 101-150<br><input type="checkbox"/> 151-200<br><input type="checkbox"/> 201-250<br><input type="checkbox"/> 251-300<br><input type="checkbox"/> 301-350<br><input type="checkbox"/> > 350   |
| Number of hotel beds:               | <input type="checkbox"/> 100-200<br><input type="checkbox"/> 201-300<br><input type="checkbox"/> 301-400<br><input type="checkbox"/> 401-500<br><input type="checkbox"/> 501-600<br><input type="checkbox"/> 601-700<br><input type="checkbox"/> > 700 |
| Number of hotel rooms:              | <input type="checkbox"/> 50-100<br><input type="checkbox"/> 101-200<br><input type="checkbox"/> 201-300<br><input type="checkbox"/> 301-400<br><input type="checkbox"/> 401-500<br><input type="checkbox"/> 501-600<br><input type="checkbox"/> > 600  |
